# Supplementary material for: Complex clover cross-sectioned nanotubules exist in the structure of the first uranium borate phosphate
Source: Royal Society of Chemistry journal article supplement (doi:10.1039/c2cc17517g), 2012-01-01
Supplement: c2cc17517g.pdf [file c2cc17517g.pdf]

## **Supporting information:**

### **Complex Clover Cross-Sectioned Nanotubules Exist in the Structure of First Uranium Borate Phosphate**

Shijun Wu, Shuao Wang, Juan Diwu, Wulf Depmeier, Thomas Malcherek, Evgeny V. Alekseev,<sup>\*</sup> and Thomas E. Albrecht-Schmitt<sup>\*</sup>

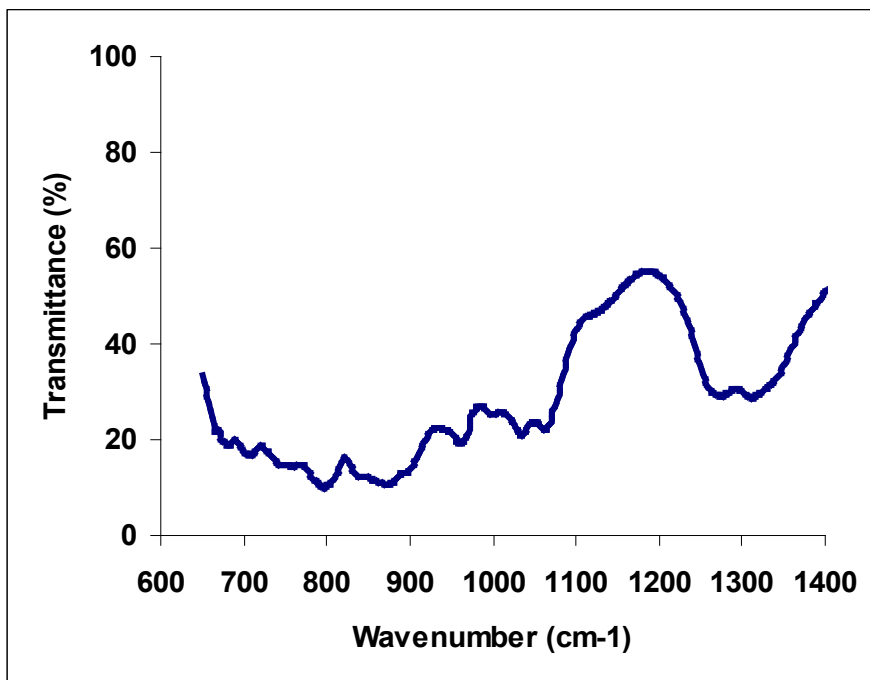

Figure S1. FTIR spectrum of **BaBPU1** (650-1400cm<sup>-1</sup>)

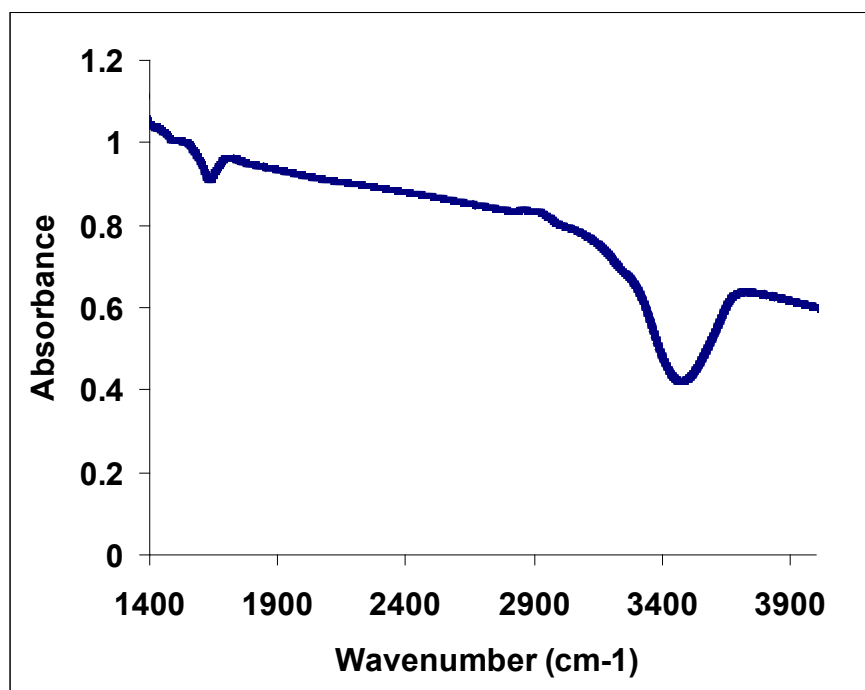

Figure S2. FTIR spectrum of **BaBPU1** (1400-4000cm<sup>-1</sup>)

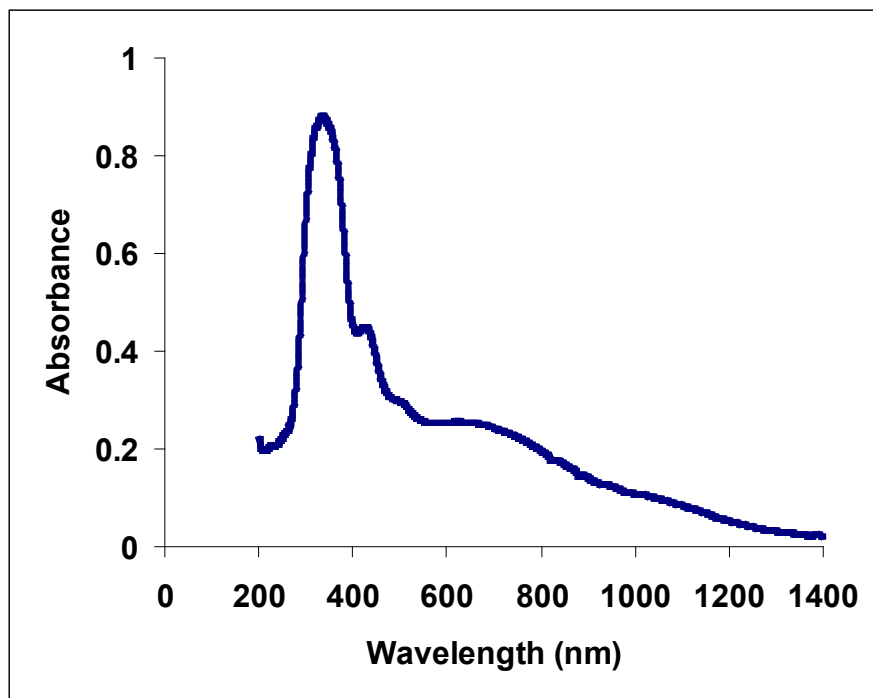

**Figure S3.** UV-vis-NIR spectrum of single crystal of **BaBPU1**

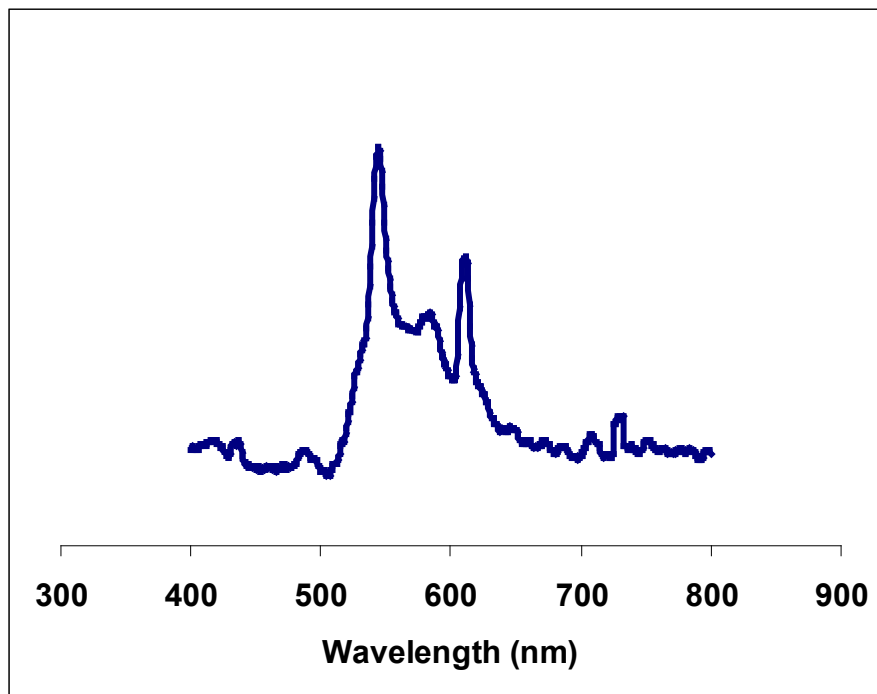

**Figure S4.** Fluorescence spectrum of single crystal of **BaBPU1**

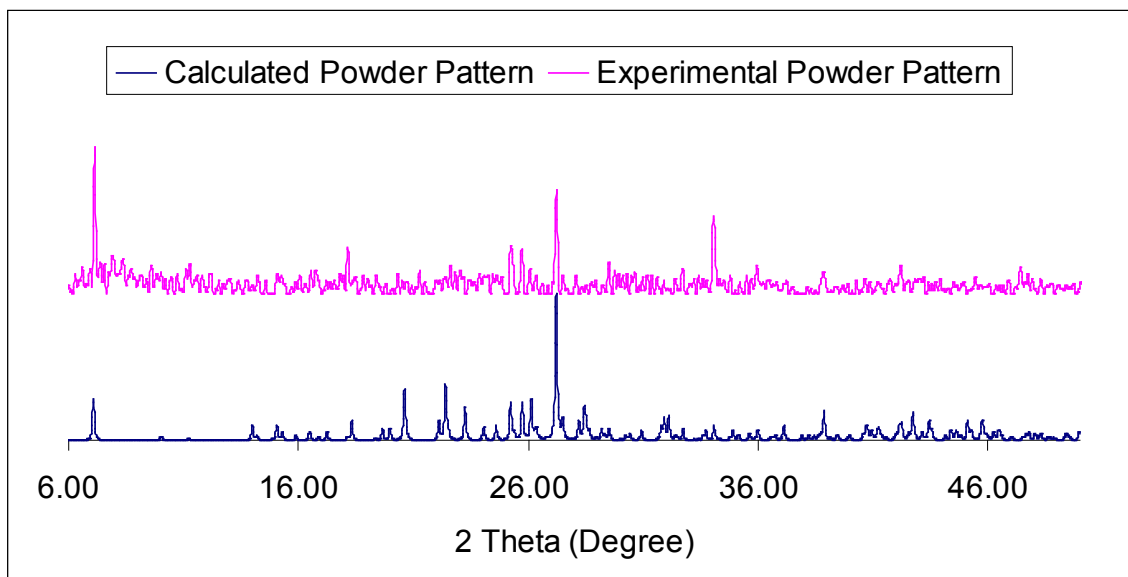

**Figure S5.** Calculated and experimental powder pattern of **BaBPU1**

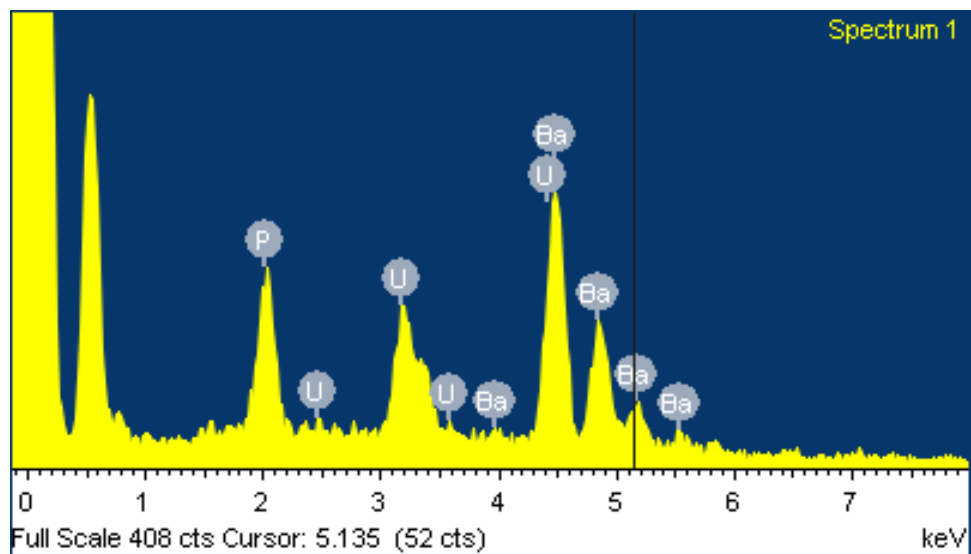

**Figure S6.** Typical EDS spectrum of **BaBPUI**

**Table S1:** Atomic ratios of **BaBPUI** according to EDS (U is kept as 1)

| Spot    | Ba   | P    | U |
|---------|------|------|---|
| 1.      | 4.22 | 3    | 1 |
| 2.      | 5.02 | 2.83 | 1 |
| 3.      | 3.61 | 1.78 | 1 |
| 4.      | 2.63 | 2.06 | 1 |
| 5.      | 4.22 | 3.00 | 1 |
| 6.      | 4.44 | 2.15 | 1 |
| 7.      | 5.33 | 2.47 | 1 |
| 8.      | 4.80 | 3.11 | 1 |
| Average | 4.28 | 2.55 | 1 |
